# Supplementary material
Source: publisher figshare collection journal article supplement (https://gsapubs.figshare.com/ndownloader/files/23298956)
Supplement: Supplementary file 1 [file 23298956]

**APPENDIX 1: SEDIMENTOLOGICAL DESCRIPTIONS OF SEDIMENT UNITS**

| Site | Unit  | Thickness (cm) | Description                                                                                                                                                                                                                                                                        |
|------|-------|----------------|------------------------------------------------------------------------------------------------------------------------------------------------------------------------------------------------------------------------------------------------------------------------------------|
| 1    | I     | 20-40          | Dark brown, carbonaceous, bioturbated silt loam containing a discontinuous unit of pebbles, and fragments of brick and pottery at ~20 cm depth.                                                                                                                                    |
| 1    | Ila-d | 100            | Repeating normally graded beds, ~20-40 cm thick, comprised of tan, moderately sorted, fine sand grading into silt with gradational contacts, and localised vertical bioturbation. Unit IIc contains localised lenses of tan, moderately sorted silt. Units IIc-d exhibit mottling. |
| 1    | III   | 2- 50          | Blue-grey, mottled, massive, plastic sandy silt                                                                                                                                                                                                                                    |
| 1    | IV    | 40             | Grey, moderately sorted, mottled, fine to medium sand.                                                                                                                                                                                                                             |
| 1    | V     | 20             | Lenses comprising tan, moderately sorted, mottled and oxidised medium sand observed within Unit IV.                                                                                                                                                                                |
| 1    | VI    | 60             | Grey, moderately sorted, medium sand with granules that coarsen downward to pebbles                                                                                                                                                                                                |
| 1    | PF    | 20-100         | Dark brown, massive, mottled silt loam. Contains irregular lenses ~2 – 25 cm thick of massive, carbonaceous (5-10%) silt loam; oxidised whole and fragmented lamb fetlock bone; fern mats; and white, coarse sand to pebble sized fragments of spongy and compact bone.            |
| 2    | VII   | 20-25          | Dark brown, carbonaceous, bioturbated, silt loam containing discontinuous unit of pottery, glass and pebbles. Appears to be re-worked.                                                                                                                                             |
| 2    | VIII  | 20-30          | Dark brown, massive, carbonaceous, bioturbated, silt loam                                                                                                                                                                                                                          |
| 2    | IXa   | 20-60          | Blue-grey, moderately sorted, bioturbated, sandy silt                                                                                                                                                                                                                              |
|      | IXb   | 10-15          | Tan, moderately sorted, mottled and oxidised silt to very fine sand with gradational and bioturbated contacts                                                                                                                                                                      |
| 2    | X     | 5-20           | Blue-grey, massive, mottled, plastic silt                                                                                                                                                                                                                                          |
